# Supplementary material for: Association of stress hyperglycemia ratio and in-hospital mortality in patients with coronary artery disease: insights from a large cohort study
Source: Springer Nature journal article supplement (doi:10.1186/s12933-022-01645-y), 2022-10-19
Supplement: MOESM1 [file 23619314]

## **Supplementary material**

### **Association of stress hyperglycemia ratio and in-hospital mortality in patients with coronary artery disease: Insights from a large cohort study**

**Table S1 and Figure S1**

**Table S1. Description of the relevant studies in discussion section**

*AMI, acute myocardial infarction; SHR, stress hyperglycemia ratio; CI, confidence interval; STEMI, ST-segment elevation myocardial infarction; NSTEMI, Non-ST-segment elevation myocardial infarction; MACE, major adverse cardiovascular events; MACCE, major adverse cardiovascular and cerebrovascular events; ACS, acute coronary syndrome; OR, odds ratio; CAD, coronary artery disease*

| <b>Authors</b> | <b>Country</b> | <b>Year</b> | <b>Population</b>                                            | <b>Endpoints</b>                                                                                | <b>Key findings</b>                                                                                                                                                                          |
|----------------|----------------|-------------|--------------------------------------------------------------|-------------------------------------------------------------------------------------------------|----------------------------------------------------------------------------------------------------------------------------------------------------------------------------------------------|
| Ma et al.      | Italy          | 2018        | 1553 individuals with AMI                                    | The composite end point of in-hospital mortality, acute pulmonary edema, and cardiogenic shock. | SHR showed the best prognostic power in predicting the end point as compared with glycemia at admission in the entire population (net reclassification improvement 12%[95%CI 4–20]; P=0.003) |
| Sia et al.     | Singapore      | 2021        | 5841 individuals with STEMI and 4105 individuals with NSTEMI | 1-year all-cause mortality                                                                      | In STEMI patients, SHR were independent predictors of 1-year all-cause mortality [OR 2.20 (95% CI 1.73–2.79)].                                                                               |
| Xu et al.      | China          | 2022        | 5417 individuals with STEMI                                  | MACE and all-cause mortality in 30 days                                                         | SHR was significantly associated with 30-day mortality in patients with STEMI and that the predictive efficiency of the TIMI risk score can be improved after adding SHR as one point.       |
| Yang et al.    | China          | 2022        | 5562 individuals with ACS who underwent drug-eluting         | MACCE and MACE at 2-year follow-up.                                                             | There were U-shaped associations of SHR with MACCE rate and MACE rate at 2-year follow-ups and J-shaped associations of SHR with in-hospital                                                 |

|                |         |      |                                                                            |                                                 |                                                                                                                                                                                                                                                                                                                         |
|----------------|---------|------|----------------------------------------------------------------------------|-------------------------------------------------|-------------------------------------------------------------------------------------------------------------------------------------------------------------------------------------------------------------------------------------------------------------------------------------------------------------------------|
|                |         |      | stent implantation                                                         |                                                 | cardiac death and MI and that at 2-year follow-up in the study population.                                                                                                                                                                                                                                              |
| Chen et al.    | China   | 2021 | 341 individuals with AMI and aged over 75 years                            | MACCE and in-hospital mortality                 | Higher SHR was independently associated with in-hospital MACCEs ([OR]: 2.945, 95% confidence interval [CI]: 1.626–5.334, P < 0.001) and all-cause death (OR: 2.871 95% CI: 1.428–5.772, P = 0.003). This relationship increased with SHR levels based on a non-linear dose-response curve.                              |
| Yang et al.    | Korea   | 2017 | 4362 individuals with CAD who underwent percutaneous coronary intervention | MACCE                                           | Compared with the lower three quartiles of SHR, the HR (95% CI) for the highest SHR quartile (Q4) group for MACCE was 1.31 (1.05, 1.64) in the total population and 1.45 (1.02, 2.06) in the non-diabetic population. The risk of MACCE in the SHR Q4 group was significantly higher in patients presenting with STEMI. |
| Schmitz et al. | Germany | 2021 | 2311 individuals with AMI                                                  | 28-day mortality and 5-year all-cause mortality | Stress hyperglycemia plays a significant role mainly regarding short-term prognosis, in particular, in non-diabetic patients, but not for long-term prognosis.                                                                                                                                                          |

**Figure S1 (a) Area under the curve for admission blood glucose, HbA1c, stress hyperglycemia ratio (SHR) in total study population; (b) Area under the curve for admission blood glucose, HbA1c, stress hyperglycemia ratio (SHR) in patients with coronary artery diseases and diabetes; (c) Area under the curve for admission blood glucose, HbA1c, stress hyperglycemia ratio (SHR) in patients with chronic coronary syndromes; (d) Area under the curve for admission blood glucose, HbA1c, stress hyperglycemia ratio (SHR) in patients with acute coronary syndromes.**

*AUC, area under curve; CI, Confidence interval.*

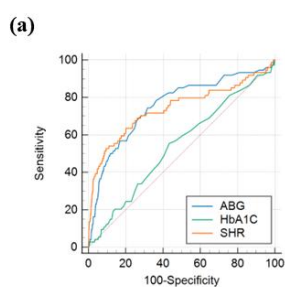

| Variable | AUC   | 95% CI        |
|----------|-------|---------------|
| ABG      | 0.757 | 0.747 - 0.766 |
| HbA1C    | 0.543 | 0.532 - 0.554 |
| SHR      | 0.741 | 0.732 - 0.751 |

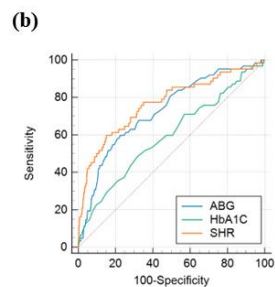

| Variable | AUC   | 95% CI        |
|----------|-------|---------------|
| ABG      | 0.728 | 0.715 - 0.741 |
| HbA1C    | 0.594 | 0.579 - 0.609 |
| SHR      | 0.766 | 0.754 - 0.779 |

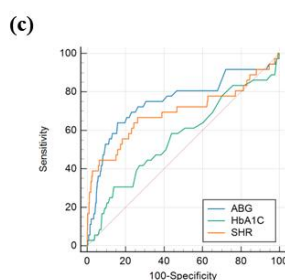

| Variable | AUC   | 95% CI        |
|----------|-------|---------------|
| ABG      | 0.750 | 0.738 - 0.762 |
| HbA1C    | 0.563 | 0.549 - 0.576 |
| SHR      | 0.694 | 0.681 - 0.706 |

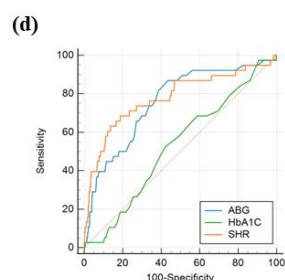

| Variable | AUC   | 95% CI        |
|----------|-------|---------------|
| ABG      | 0.757 | 0.741 - 0.772 |
| HbA1C    | 0.528 | 0.510 - 0.546 |
| SHR      | 0.779 | 0.763 - 0.793 |
